# Supplementary material for: Synthesis of fluorinated amphiphilic triblock copolymer and its application in high temperature PEM fuel cells
Source: Royal Society of Chemistry journal article supplement (doi:10.1039/c2jm16071d), 2012-01-01
Supplement: c2jm16071d.pdf [file c2jm16071d.pdf]

## Electronic supplementary information

### Synthesis of Fluorinated Amphiphilic Triblock Copolymer and its Application to High Temperature-Operable Fuel Cell

*Dong Youb Oh,<sup>a</sup> Jea Uk Lee,<sup>b</sup> and Won Ho Jo<sup>\*a</sup>*

<sup>a</sup> Department of Materials Science and Engineering, Seoul National University, Seoul 151-742, Korea

<sup>b</sup> Composite Materials Research Group, Korea Institute of Materials Science, Changwon, Gyeongnam,  
642-831, Korea

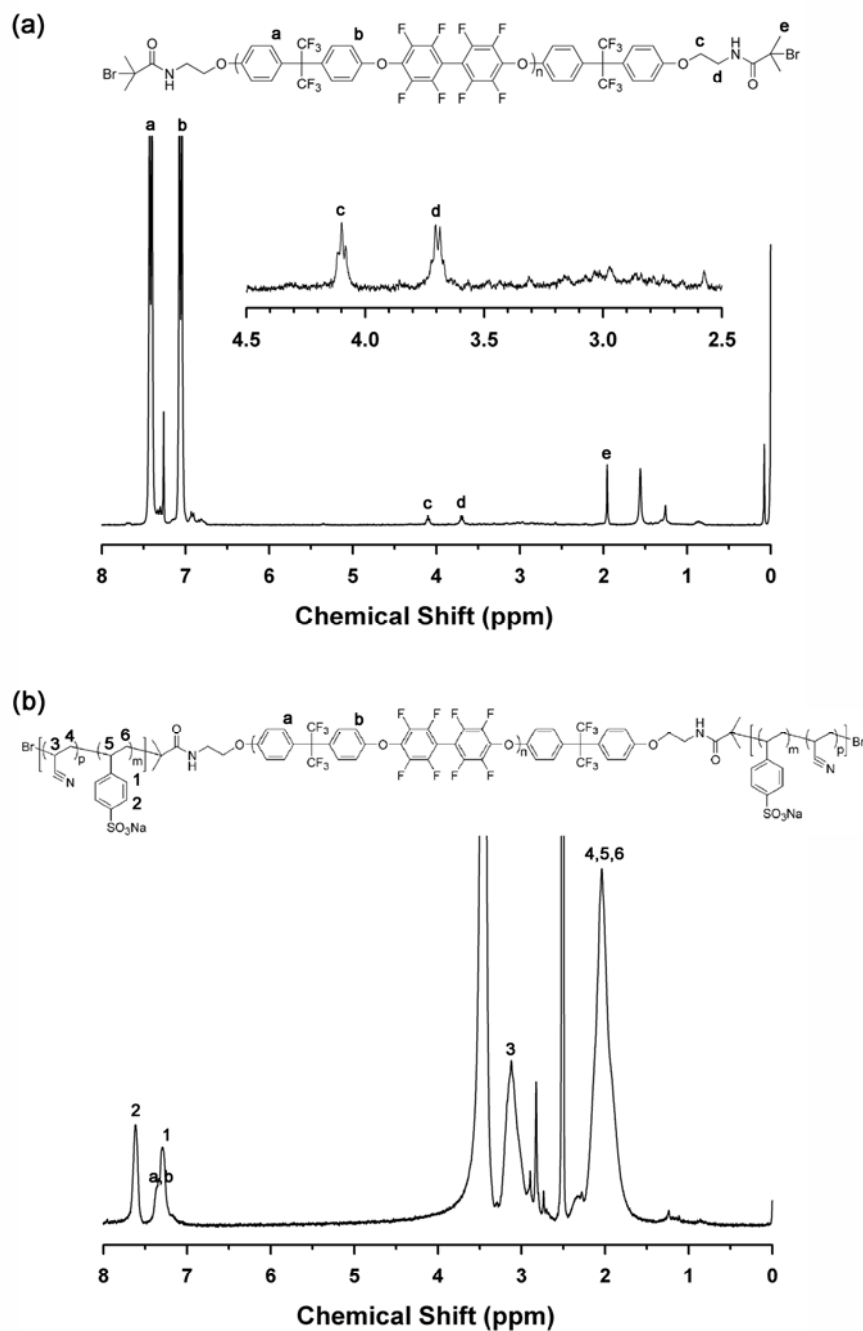

**Figure. S1** <sup>1</sup>H NMR spectra of (a) FPAE macroinitiator and (b) SPSAN-*b*-FPAE-*b*-SPSAN using CDCl<sub>3</sub> and DMSO-*d*<sub>6</sub> as solvents, respectively.

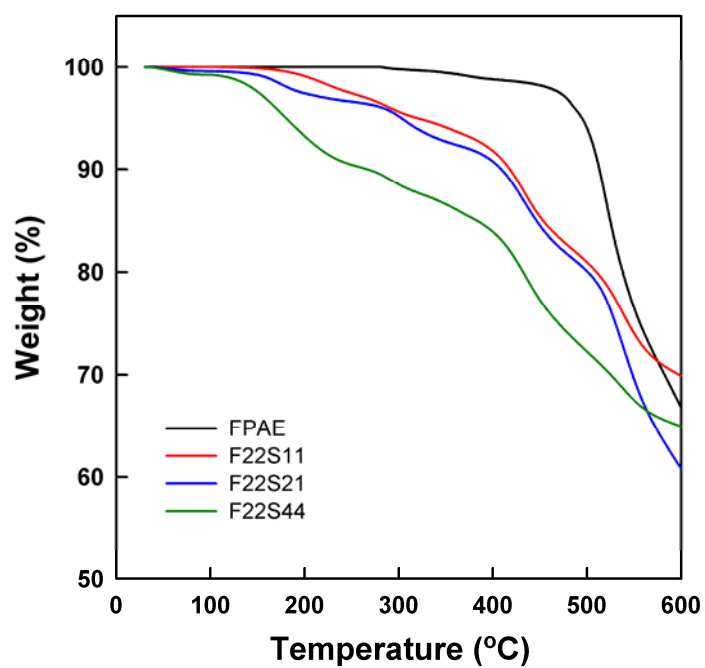

**Figure. S2** TGA traces of FPAAE and triblock copolymer membranes.

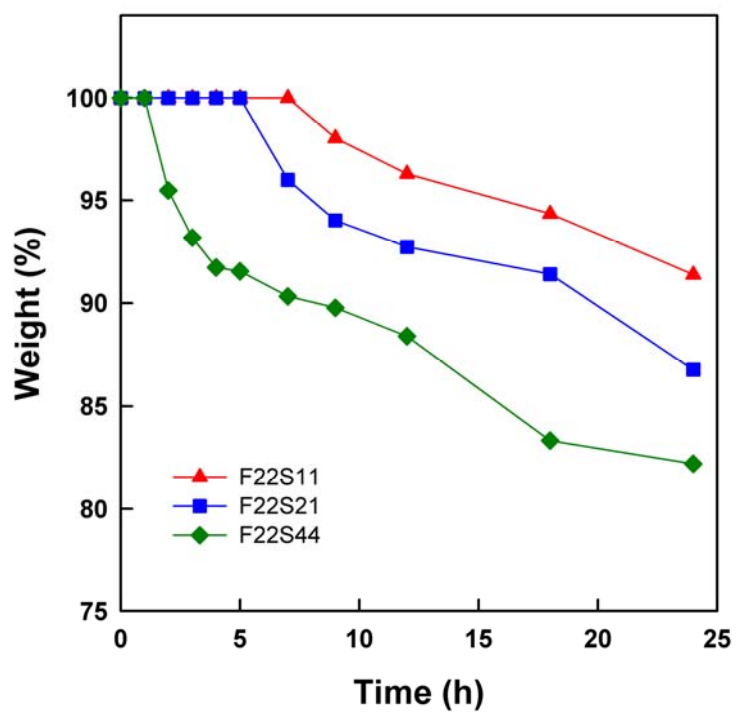

**Figure. S3** Weight loss of triblock copolymer membranes in Fenton's test.

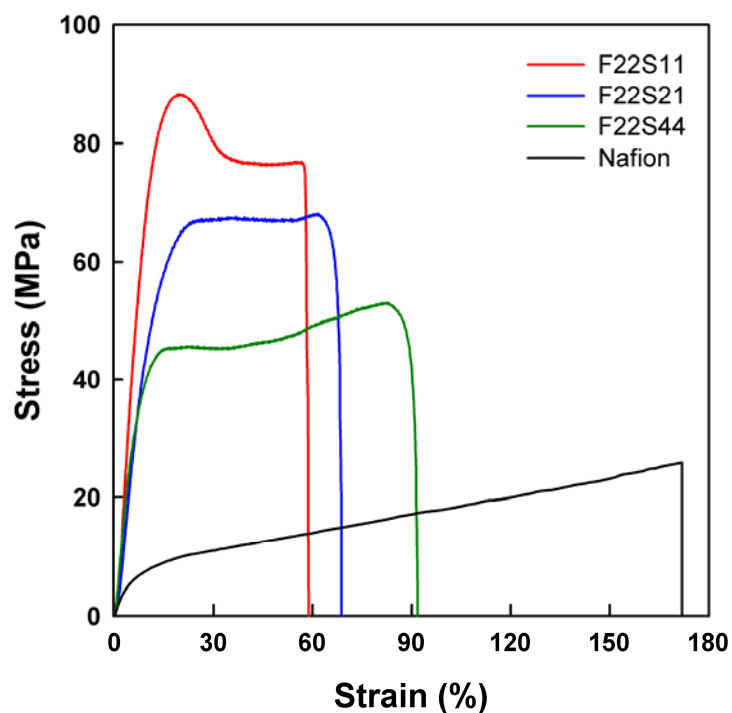

**Figure. S4** Stress-strain curves of triblock copolymer membranes and Nafion under hydrated condition.

**Table S1.** Mechanical properties of triblock copolymer membranes and Nafion under hydrated condition.

| Sample        | Young's modulus (MPa) | Tensile strength (MPa) | Elongation at break (%) |
|---------------|-----------------------|------------------------|-------------------------|
| <b>F22S11</b> | 908                   | 88.34                  | 59                      |
| <b>F22S21</b> | 523                   | 67.85                  | 69                      |
| <b>F22S44</b> | 524                   | 52.96                  | 92                      |
| <b>Nafion</b> | 166                   | 25.58                  | 172                     |
